# Supplementary material for: Electric dipole modulation for boosting carrier recombination in green InP QLEDs under strong electron injection
Source: Royal Society of Chemistry journal article supplement (doi:10.1039/d2na00705c), 2022-11-01
Supplement: d2na00705c1.pdf [file d2na00705c1.pdf]

Electronic Supplementary Information (ESI)

## Electric dipole modulation for boosting carrier recombination in green InP QLEDs under strong electron injection

Tianqi Zhang,<sup>a, b, c</sup> Pai Liu,<sup>b, c</sup> Fangqing Zhao,<sup>b, c</sup> Yangzhi Tan,<sup>b, c</sup> Jiayun Sun,<sup>b, c</sup> Xiangtian Xiao,<sup>b, c</sup> Zhaojing Wang,<sup>b, c</sup> Qingqian Wang,<sup>b, c</sup> Fankai Zheng,<sup>b, c</sup> Xiao Wei Sun,<sup>b, c</sup> Dan Wu,<sup>d</sup> Guichuan Xing <sup>\*a</sup> and Kai Wang <sup>\*b, c</sup>

<sup>a</sup> Institute of Applied Physics and Materials Engineering, University of Macau, Macau, 999078, China. E-mail: [gcxing@um.edu.mo](mailto:gcxing@um.edu.mo)

<sup>b</sup> Guangdong University Key Laboratory for Advanced Quantum Dot Displays and Lighting, and Department of Electrical and Electronic Engineering, Southern University of Science and Technology, Shenzhen, 518055, China. E-mail: [wangk@sustech.edu.cn](mailto:wangk@sustech.edu.cn)

<sup>c</sup> Key Laboratory of Energy Conversion and Storage Technologies (Southern University of Science and Technology), Ministry of Education, Shenzhen, 518055, China.

<sup>d</sup> College of New Materials and New Energies, Shenzhen Technology University, Shenzhen 518118, China.

**Table S1. Parameter information of functional layers used in simulations**

| Functional layers | HOMO (eV) | LUMO(eV) | Carrier mobilities (cm <sup>2</sup> V s <sup>-1</sup> ) |
|-------------------|-----------|----------|---------------------------------------------------------|
| PEDOT:PSS         | -5.2      | -4.7     | 7.0×10 <sup>-3</sup> for holes                          |
| MoO <sub>3</sub>  | -9.7      | -6.7     | 8×10 <sup>-6</sup> for holes                            |
| PVK               | -5.8      | -2.2     | 1.6×10 <sup>-6</sup> for holes                          |
| Green InP/ZnS QDs |           |          |                                                         |
| ZnMgO             | -7.6      | -3.6     | 1.0×10 <sup>-3</sup> for electrons                      |
| ZnO               | -7.5      | -4.0     | 4.0×10 <sup>-3</sup> for electrons                      |

The parameter information of functional layers is based on the data recognized in the literature <sup>1-3</sup> and others of them are based on the preset parameters in *Setfos* software.

**Table S2. Lifetime of green InP QLEDs with different ETL (ZnMgO and ZnO) and with/without MoO<sub>3</sub> interlayer.**

| Devices designations        | T <sub>50</sub> @ 1000 cd m <sup>-2</sup> (h) | T <sub>50</sub> @ 100 cd m <sup>-2</sup> (h) |
|-----------------------------|-----------------------------------------------|----------------------------------------------|
| ZnO                         | 0.25                                          | 15.77                                        |
| ZnMgO                       | 0.75                                          | 47.31                                        |
| ZnO with MoO <sub>3</sub>   | 1.65                                          | 104.09                                       |
| ZnMgO with MoO <sub>3</sub> | 4.45                                          | 280.75                                       |

We conducted the lifetime measurements with the initial luminance of 1000 cd m<sup>-2</sup> under the constant current condition. Then, we calculated the lifetime of 100 cd m<sup>-2</sup> initial luminance according to the following equations and the general aging coefficient of 1.8.

$$T_{50} = (L_0/100)^n T$$

Where the L<sub>0</sub> is the initial brightness of 1000 cd m<sup>-2</sup> in this work, n is the general aging coefficient of 1.8, and T is the time taken for the actual brightness to decay to 50% of the initial brightness.

**Table S3. Evaporation conditions of MoO<sub>3</sub> films with different thicknesses**

| No.            | Average thickness (nm) | Average evaporation rate (nm s <sup>-1</sup> ) <sup>a</sup> | Time (s) |
|----------------|------------------------|-------------------------------------------------------------|----------|
| 1              | 0.1                    |                                                             | 11       |
| 2              | 0.3                    |                                                             | 32       |
| 3              | 0.5                    | 0.01                                                        | 55       |
| 4              | 0.7                    |                                                             | 73       |
| 5 <sup>b</sup> | 100.0                  | 0.01                                                        | 9381     |

<sup>a)</sup> The average evaporation rate is an average value calculated by the built-in system of the evaporation equipment according to the crystal oscillator vibration frequency. The fluctuation of evaporation rate leads to the film thickness not completely equal to the product of the evaporation rate and the time.

<sup>b)</sup> In order to ensure that the film can be evaporated at the low average rate, we have evaporated a film of 100nm for an extended time.

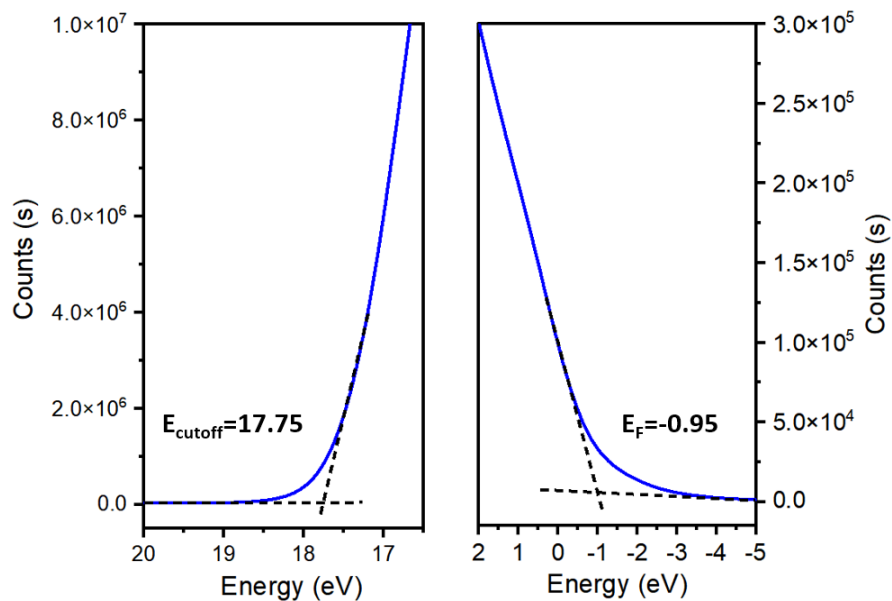

**Figure S1†.** UPS spectra of secondary-electron cutoff and Fermi edge regions (right) of green InP/ZnS QDs.

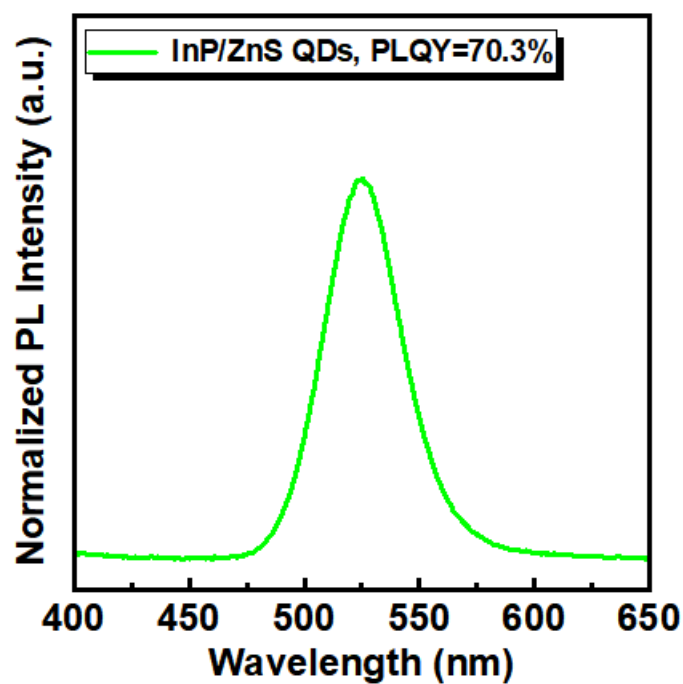

**Figure S2†.** The photoluminescence (PL) spectra of green InP/ZnS QDs solution.

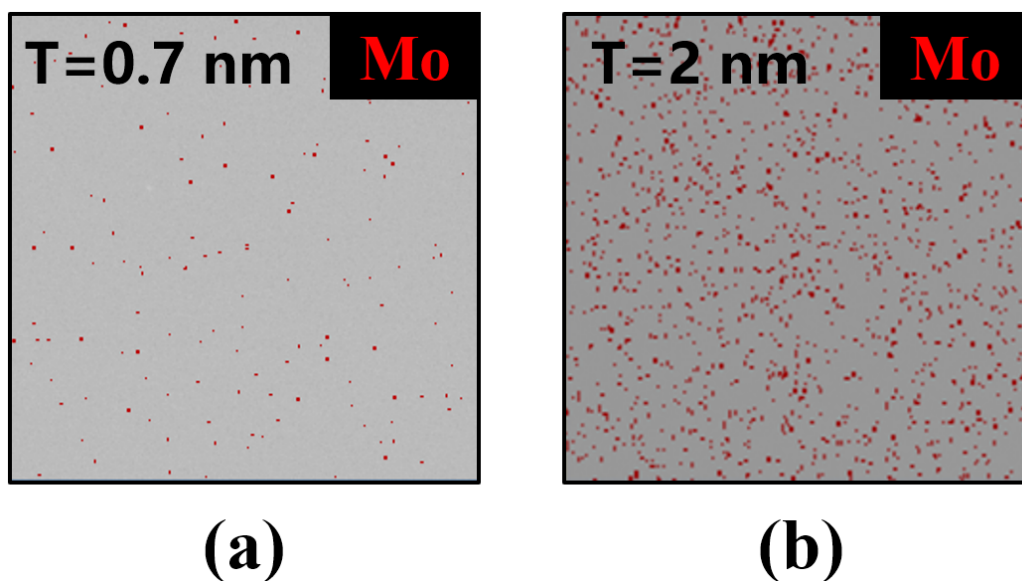

**Figure S3†.** EDS compositional mapping images (top view) for ITO/PEDPT:PSS modified with different average thicknesses of MoO<sub>3</sub> layer: (a) 0.7 nm, (b) 2 nm.

#### Reference

1. H. Moon, W. Lee, J. Kim, D. Lee, S. Cha, S. Shin, and H. Chae, *Chem. Commun.*, 2019, **55**, 13299-13302. **(Ref. 23)**
2. Q. Su, H. Zhang, and S. M. Chen, *Appl. Phys. Lett.*, 2020, **117**.**(Ref. 26)**
3. X. T. Xiao, K. Wang, T. K. Ye, R. Cai, Z. W. Ren, D. Wu, X. W. Qu, J. Y. Sun, S. H. Ding, X. W. Sun, and W. C. H. Choy, *Communications Materials*, 2020, **1**, 1. **(Ref. 45)**
